# Supplementary material for: Porous graphene doped with Fe/N/S and incorporating Fe3O4 nanoparticles for efficient oxygen reduction
Source: Royal Society of Chemistry journal article supplement (doi:10.1039/c8cy01328d), 2018-01-01
Supplement: c8cy01328d1.pdf [file c8cy01328d1.pdf]

## Supporting Information

### **Porous graphene doped with Fe/N/S incorporated Fe<sub>3</sub>O<sub>4</sub> nanoparticles for efficient oxygen reduction reaction**

Yi Li,<sup>a</sup> Yazhou Zhou,<sup>\*, a, b</sup> Chengzhou Zhu,<sup>c</sup> Yun Hang Hu,<sup>d</sup> Shuai Gao,<sup>a</sup>

Qinqin Liu,<sup>a, b</sup> Xiaonong Cheng,<sup>a</sup> Lili Zhang,<sup>b</sup> Juan Yang,<sup>\*, a, b</sup> and Yuehe Lin<sup>c</sup>

<sup>a</sup>School of Materials Science and Engineering, Jiangsu University, Zhenjiang, Xuefu Road 301, China. \*Email address: yangjuan6347@ujs.edu.cn; zhouyazhou60@gmail.com

<sup>b</sup>Jiangsu Key Laboratory for Chemistry of Low-Dimensional Materials, School of Chemistry and Chemical Engineering, Huaiyin Normal University, Huaian 223300, China.

<sup>c</sup>School of Mechanical and Materials Engineering, Washington State University, Pullman, WA 99164, USA.

<sup>d</sup>Department of Materials Science and Engineering, Michigan Technological University, Houghton, Michigan 49931, USA.

### **Electrochemical evaluations**

**Electrode potentials conversion.** Potentials measured versus Ag/AgCl electrode were converted to a reversible hydrogen electrode (RHE) scale based on the following formula [S1-S4]:

$$E_{\text{vsRHE}} = E_{\text{vsAg/AgCl}} + E_{\text{Ag/AgCl}}^0 + 0.059\text{pH (in volts)} \quad (1)$$

**Koutecky-Levich (K-L) plots.** The working electrode was scanned cathodically at the rate of 10 mV s<sup>-1</sup> with the rotation speed from 225 to 2500 rpm. The relevant K-L plots ( $-J^{-1}$  vs.  $\omega^{-1/2}$ ) are calculated by the following formula [S2]:

$$\frac{1}{J} = \frac{1}{J_k} + \frac{1}{J_d} = \frac{1}{J_k} + \frac{1}{B\omega^{1/2}} \quad (2)$$

$$B = 0.62nFC_0D_0^{2/3}\mu^{-1/6} \quad (3)$$

where  $B$  and  $\omega$  are the reciprocal of the slope and the angular velocity of the electrode, respectively,  $n$  is the transferred electrons for ORR,  $F$  is the Faraday constant ( $F=96485 \text{ C mol}^{-1}$ ),  $\mu$  is the kinematic viscosity of the electrolyte ( $0.01 \text{ cm}^2 \text{ s}^{-1}$ ),  $D_0$  is the diffusion coefficient of  $\text{O}_2$  in  $0.1 \text{ M KOH}$  ( $D_0=1.9 \times 10^{-5} \text{ cm}^2 \text{ s}^{-1}$ ), and  $C_0$  is the concentration of  $\text{O}_2$  ( $C_0=1.2 \times 10^{-6} \text{ mol cm}^{-3}$ ). Furthermore,  $J_k$  is the kinetic-limiting current density, and  $J_d$  is the diffusing-limiting current density. The constant 0.62 is adopted when the rotation rate is expressed in  $\text{rad s}^{-1}$ .  $J_k$  can be calculated from  $J_d$  according to eq2 [S2]:

$$J_k = \frac{J \times J_d}{J_d - J} \quad (4)$$

The hydrogen peroxide yield ( $\% \text{H}_2\text{O}_2$ ) was calculated by the following equation [S4]:

$$\% \text{H}_2\text{O}_2 = 200 \frac{i_r / N}{i_d + i_r / N} = 200 \frac{i_r}{Ni_d + i_r}$$

Where  $i_d$  is the disk current,  $i_r$  is ring current, and  $N$  is the Pt ring current collection efficiency (0.37). The current-time ( $i$ - $t$ ) chronoamperometric response curves were recorded at  $-0.35 \text{ V vs. Ag/AgCl}$  in  $\text{O}_2$ -saturated  $0.1 \text{ M KOH}$  solution at a rotating rate of  $1600 \text{ rpm}$ .

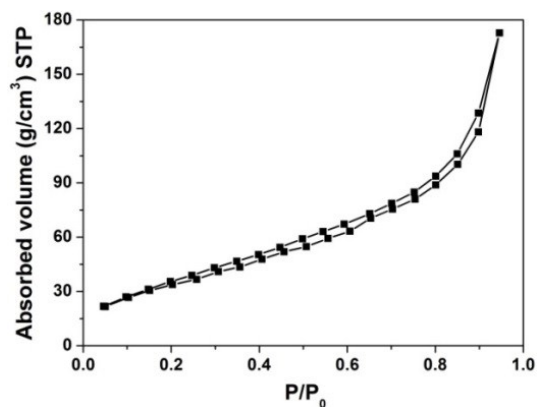

**Figure S1** The N<sub>2</sub> adsorption/deposition isotherms of HSG.

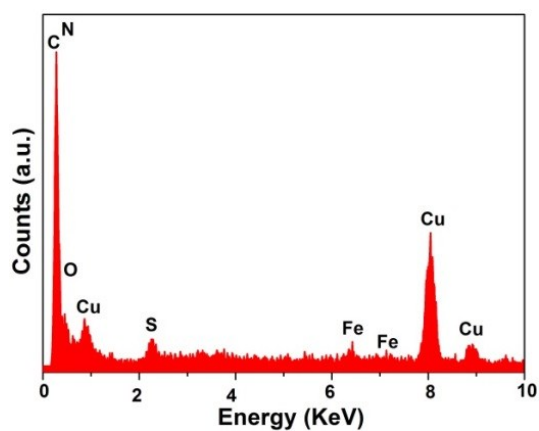

**Figure S2** The EDS spectrum of the Fe<sub>3</sub>O<sub>4</sub>/FeNSG-3.

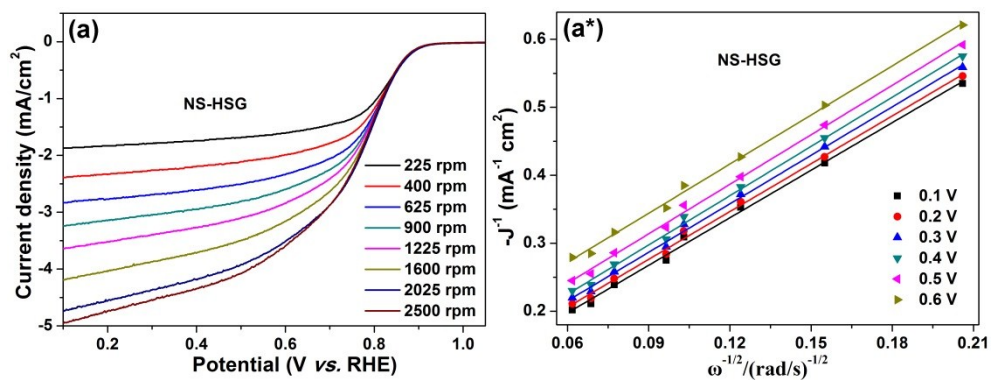

**Figure S3** (a) RDE polarization curves on NS-HSG catalyst at different rotation rates, (a\*) is the corresponding picture of K-L plots of  $-J^{-1}$  versus  $\omega^{-1/2}$ .

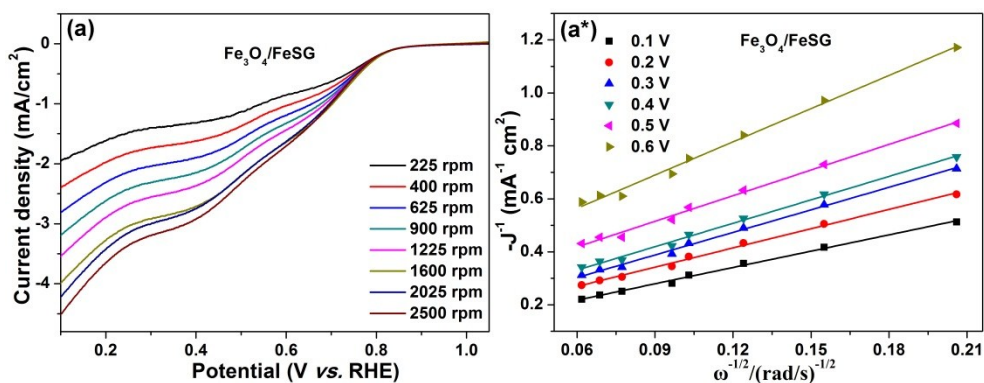

**Figure S4** (a) RDE polarization curves on  $\text{Fe}_3\text{O}_4/\text{FeSG}$  catalyst at different rotation rates, (a\*) is the corresponding picture of K-L plots of  $-J^{-1}$  versus  $\omega^{-1/2}$ .

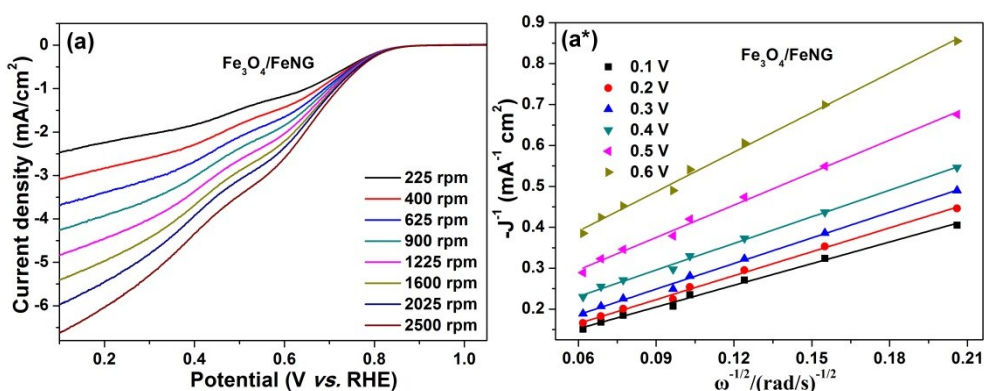

**Figure S5** (a) RDE polarization curves on  $\text{Fe}_3\text{O}_4/\text{FeNG}$  catalyst at different rotation rates, (a\*) is the corresponding picture of K-L plots of  $-J^{-1}$  versus  $\omega^{-1/2}$ .

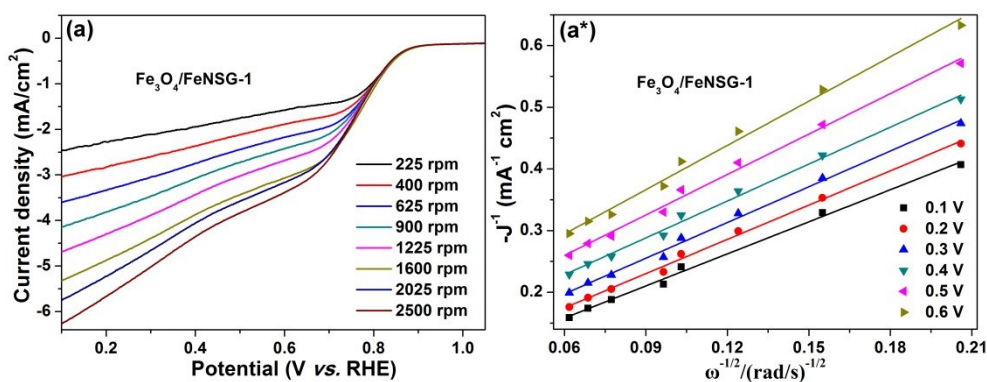

**Figure S6** (a) RDE polarization curves on  $\text{Fe}_3\text{O}_4/\text{FeNSG-1}$  catalyst at different rotation rates, (a\*) is the corresponding picture of K-L plots of  $-J^{-1}$  versus  $\omega^{-1/2}$ .

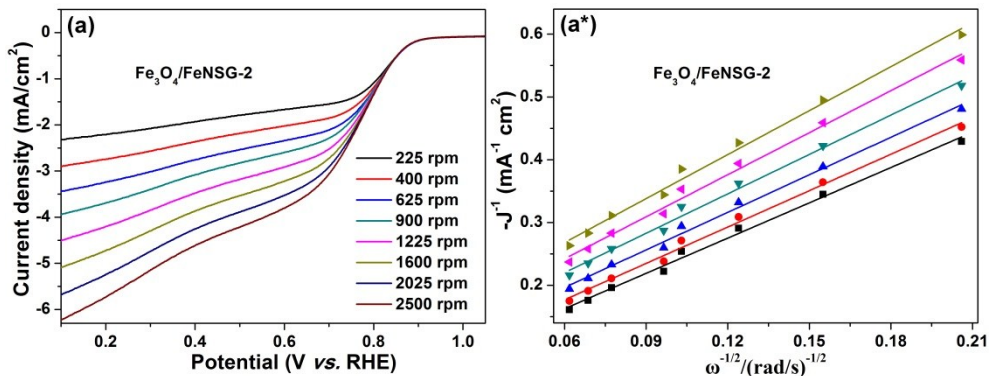

**Figure S7** (a) RDE polarization curves on  $\text{Fe}_3\text{O}_4/\text{FeNSG-2}$  catalyst at different rotation rates, (a\*) is the corresponding picture of K-L plots of  $-J^{-1}$  versus  $\omega^{-1/2}$ .

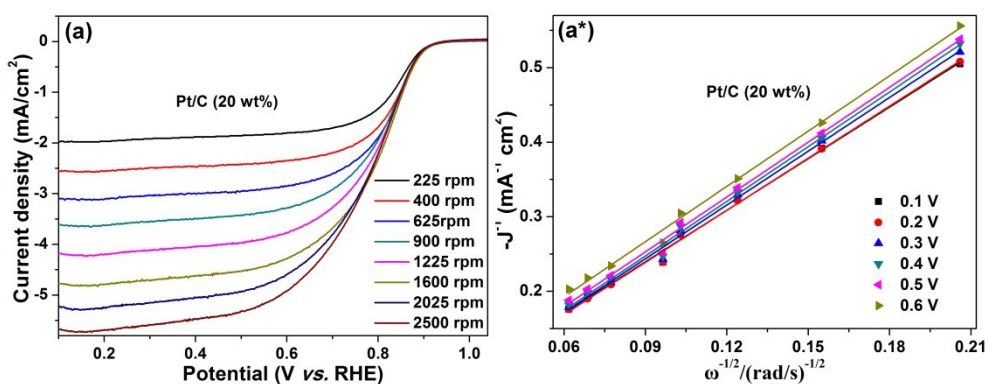

**Figure S8** (a) RDE polarization curves on  $\text{Fe}_3\text{O}_4/\text{FeNSG-2}$  catalyst at different rotation rates, (a\*) is the corresponding picture of K-L plots of  $-J^{-1}$  versus  $\omega^{-1/2}$ .

**Table S1** The  $I_D/I_G$  values of different  $\text{Fe}_3\text{O}_4/\text{FeNSG}$  hybrids, for comparison, the  $I_D/I_G$  values of pure HSG and NS-HSG are also presented.

| Samples                                | $I_D/I_G$ |
|----------------------------------------|-----------|
| HSG                                    | 0.956     |
| NS-HSG                                 | 1.046     |
| $\text{Fe}_3\text{O}_4/\text{FeNSG-1}$ | 0.961     |
| $\text{Fe}_3\text{O}_4/\text{FeNSG-2}$ | 0.992     |
| $\text{Fe}_3\text{O}_4/\text{FeNSG-3}$ | 0.963     |

**Table S2** Textual parameters of  $\text{N}_2$  adsorption/deposition analysis for different samples

| Sample                                 | $S_{BET}$ ( $\text{m}^2 \text{g}^{-1}$ ) | Pore vol. ( $\text{cm}^3 \text{g}^{-1}$ ) |
|----------------------------------------|------------------------------------------|-------------------------------------------|
| NS-HSG                                 | 406.4                                    | 0.236                                     |
| $\text{Fe}_3\text{O}_4/\text{FeNSG-1}$ | 429.9                                    | 0.282                                     |
| $\text{Fe}_3\text{O}_4/\text{FeNSG-2}$ | 608.6                                    | 0.415                                     |
| $\text{Fe}_3\text{O}_4/\text{FeNSG-3}$ | 530.5                                    | 0.311                                     |

## References

- [S1] Y. Li, J. Yang, N. Zhao, J. Huang, Y. Zhou, K. Xu, N. Zhao, *Appl. Catal., A*, 2017, **534**, 30-39.
- [S2] Y. Zhou, C. Yen Hsu, S. Fu, G. Yang, C. Zhu, D. Du, P. Wo Ching, X. Cheng, J. Yang, C.M. Wai, Y. Lin, *Green Chem.*, 2015, **17**, 3552-3560.
- [S3] Y. Li, J. Yang, J. Huang, Y. Zhou, K. Xu, N. Zhao, X. Cheng, *Carbon*, 2017, **122**, 237-246.
- [S4] P. Chen, T. Zhou, L. Xing, K. Xu, Y. Tong, H. Xie, L. Zhang, W. Yan, W. Chu, C. Wu, Y. Xie, *Angew. Chem. Int. Ed.*, 2017, **56**, 610-614.
